# Supplementary material for: Combined Metabolic Activators accelerates recovery in mild-to-moderate COVID-19
Source: bioRxiv or medRxiv preprint supplement (doi:10.1101/2020.10.02.20202614), 2021-02-20
Supplement: Supplementary file [file media-3.pdf]

ALL

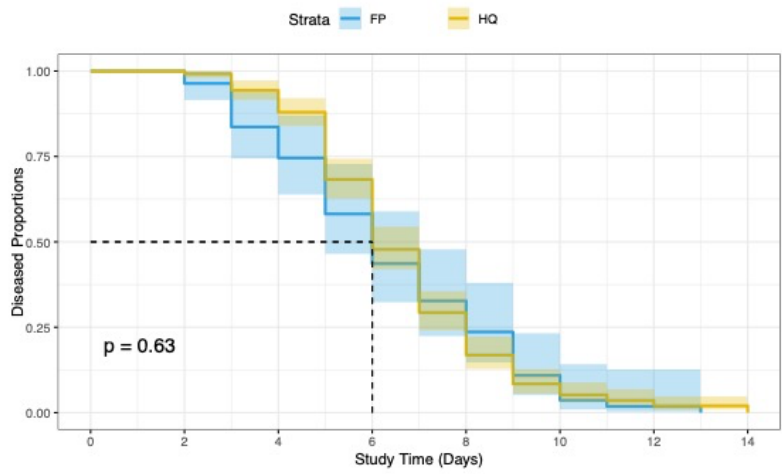

Number at risk

| Strata | FP | HQ  |
|--------|----|-----|
| 0      | 55 | 249 |
| 2      | 55 | 249 |
| 4      | 46 | 235 |
| 6      | 32 | 170 |
| 8      | 18 | 73  |
| 10     | 6  | 21  |
| 12     | 1  | 9   |
| 14     | 0  | 5   |

Placebo

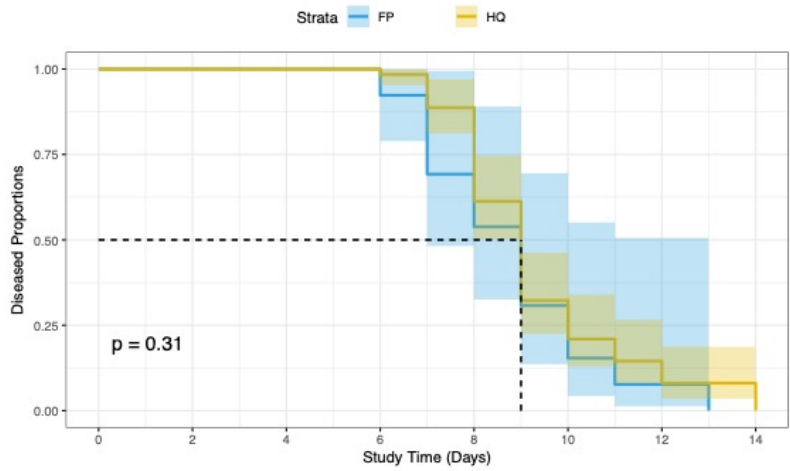

Number at risk

| Strata | FP | HQ |
|--------|----|----|
| 0      | 13 | 62 |
| 2      | 13 | 62 |
| 4      | 13 | 62 |
| 6      | 13 | 62 |
| 8      | 9  | 55 |
| 10     | 4  | 20 |
| 12     | 1  | 9  |
| 14     | 0  | 5  |

CMA

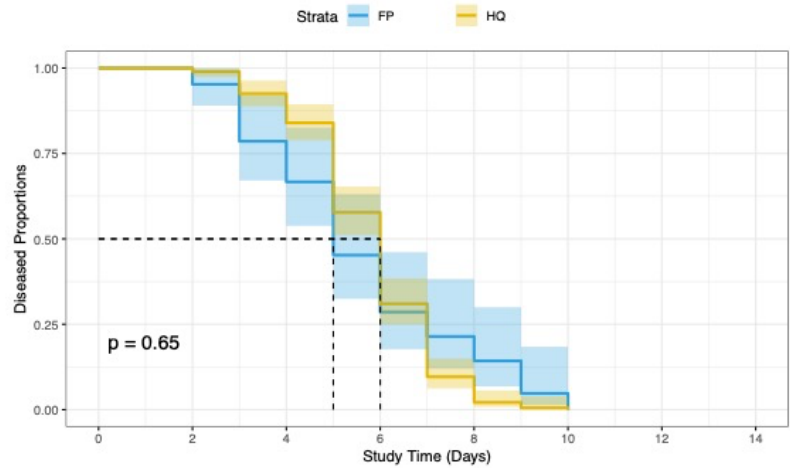

Number at risk

| Strata | FP | HQ  |
|--------|----|-----|
| 0      | 42 | 187 |
| 2      | 42 | 187 |
| 4      | 33 | 173 |
| 6      | 19 | 108 |
| 8      | 9  | 18  |
| 10     | 2  | 1   |
| 12     | 0  | 0   |
| 14     | 0  | 0   |
