# Supplementary material for: Combined Metabolic Activators accelerates recovery in mild-to-moderate COVID-19
Source: bioRxiv or medRxiv preprint supplement (doi:10.1101/2020.10.02.20202614), 2021-02-20

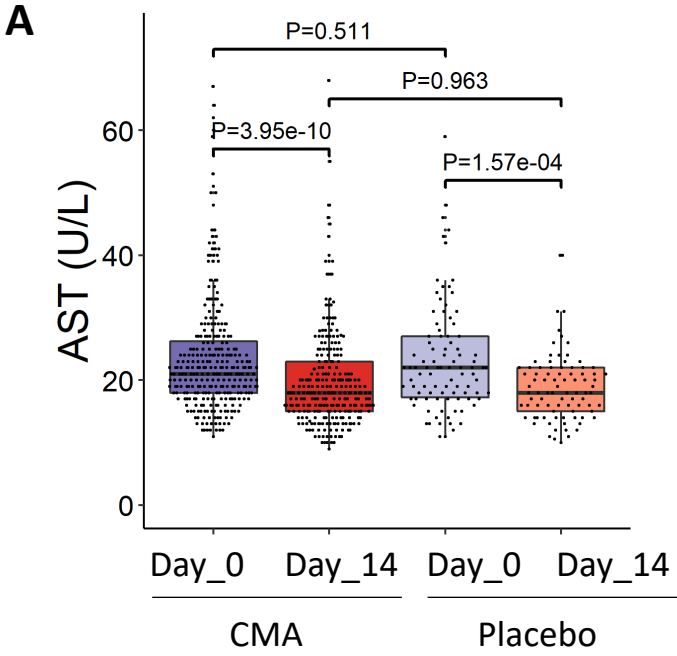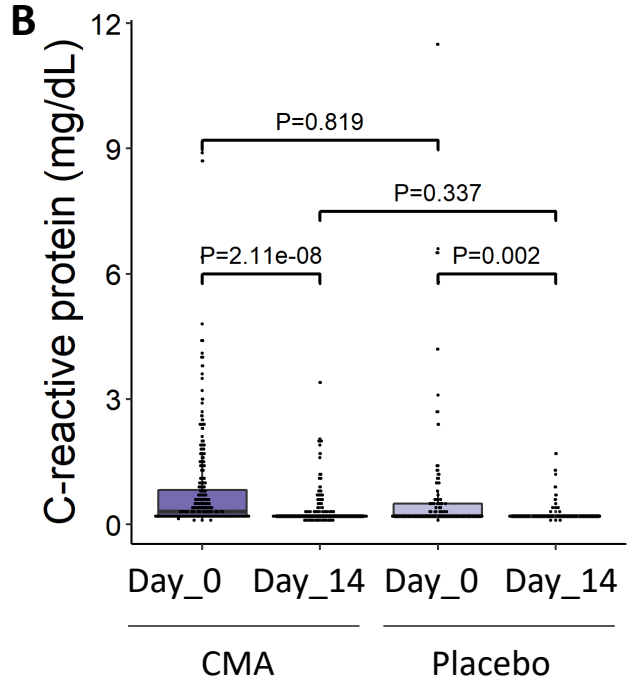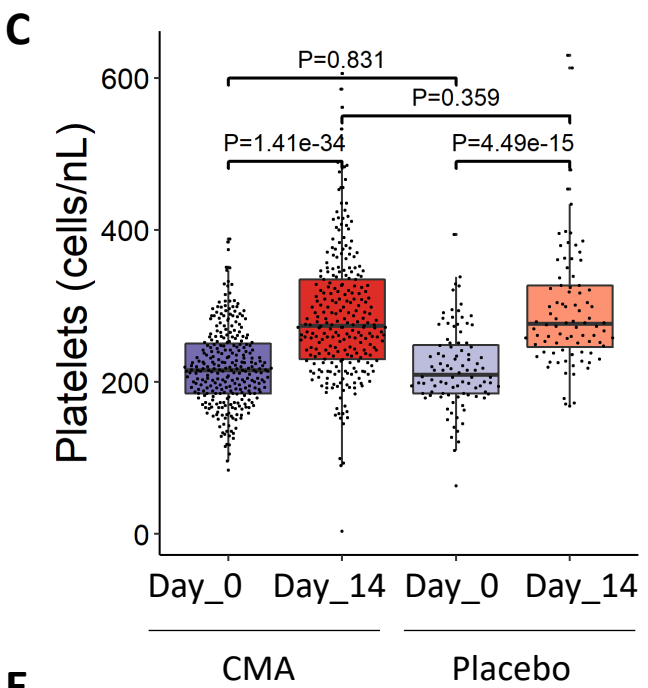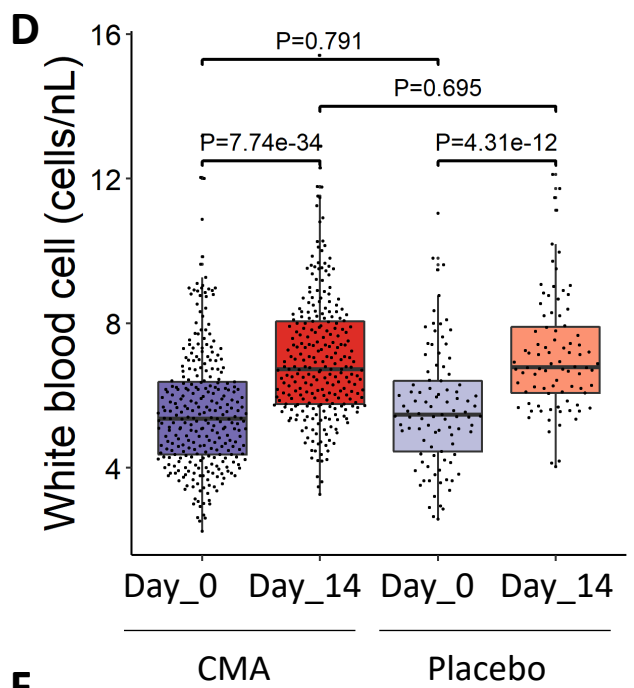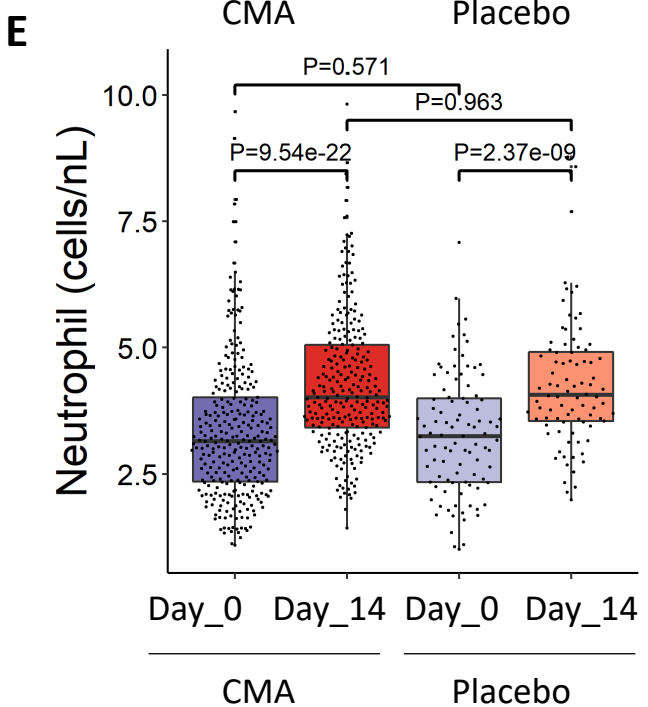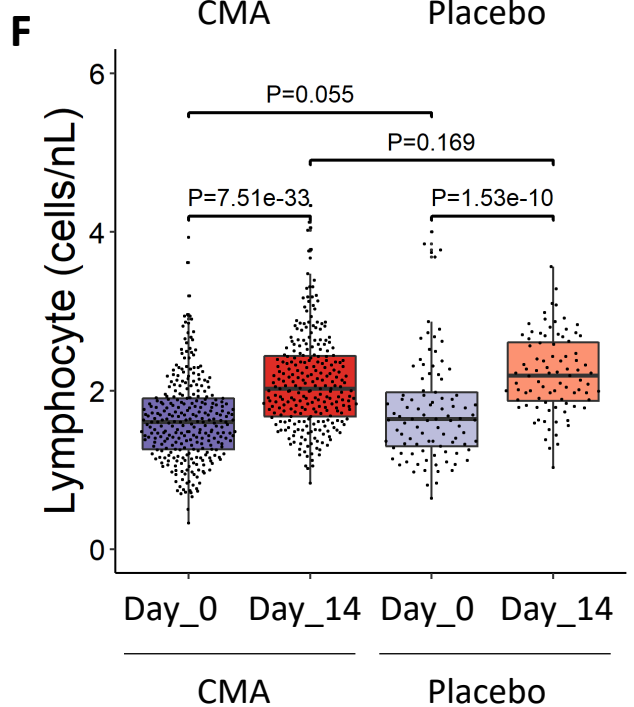

Supplement: Supplementary file [file media-4.pdf]
